# Supplementary material for: Contamination Status and Risk Assessment of Paralytic Shellfish Toxins in Shellfish along the Coastal Areas of China
Source: MDPI journal article supplement (doi:10.3390/md22020064), 2024-01-26
Supplement: s1 [file s1]

**Table S1.** Classification and detailed structure of PSTs.

| Classification          | Profile | R1  | R2                             | R3                             | R4                                 |
|-------------------------|---------|-----|--------------------------------|--------------------------------|------------------------------------|
| carbamate toxins        | STX     | -H  | -H                             | -H                             | -OCONH <sub>2</sub>                |
|                         | NEO     | -OH | -H                             | -H                             |                                    |
|                         | GTX1    | -OH | -OSO <sub>3</sub> <sup>-</sup> | -H                             |                                    |
|                         | GTX2    | -H  | -OSO <sub>3</sub> <sup>-</sup> | -H                             |                                    |
|                         | GTX3    | -H  | -H                             | -OSO <sub>3</sub> <sup>-</sup> |                                    |
|                         | GTX4    | -OH | -H                             | -OSO <sub>3</sub> <sup>-</sup> |                                    |
| n-sulfocarbamoyl toxins | C1      | -H  | -OSO <sub>3</sub> <sup>-</sup> | -H                             | -OCONHSO <sub>3</sub> <sup>-</sup> |
|                         | C2      | -H  | -H                             | -OSO <sub>3</sub> <sup>-</sup> |                                    |
|                         | C3      | -OH | -OSO <sub>3</sub> <sup>-</sup> | -H                             |                                    |
|                         | C4      | -OH | -H                             | -OSO <sub>3</sub> <sup>-</sup> |                                    |
|                         | GTX5    | -H  | -H                             | -H                             |                                    |
|                         | GTX6    | -OH | -H                             | -H                             |                                    |
| decarbamoyl toxins      | dcGTX1  | -OH | -OSO <sub>3</sub> <sup>-</sup> | -H                             | -OH                                |
|                         | dcGTX2  | -H  | -OSO <sub>3</sub> <sup>-</sup> | -H                             |                                    |
|                         | dcGTX3  | -H  | -H                             | -OSO <sub>3</sub> <sup>-</sup> |                                    |
|                         | dcGTX4  | -OH | -H                             | -OSO <sub>3</sub> <sup>-</sup> |                                    |
|                         | dcSTX   | -H  | -H                             | -H                             |                                    |
| deoxydecarbamoyl toxins | doSTX   | -H  | -H                             | -H                             | -H                                 |
|                         | doGTX2  | -H  | -H                             | -OSO <sub>3</sub> <sup>-</sup> |                                    |
|                         | doGTX3  | -H  | -OSO <sub>3</sub> <sup>-</sup> | -H                             |                                    |

Table S2. LC-MS/MS conditions [82].

| Liquid chromatography conditions |                                                                                                 | Mass spectrometry conditions              |                                          |
|----------------------------------|-------------------------------------------------------------------------------------------------|-------------------------------------------|------------------------------------------|
| chromatographic column           | TSK-Amide-80<br>(3 $\mu$ m, 2mm $\times$ 150mm)                                                 | electrospray ionization                   | ESI                                      |
| column temperature               | 40°C                                                                                            | Multi-response monitoring                 | MRM                                      |
| flow velocity                    | 0.35mL/min                                                                                      | mode                                      | positive and negative ion switching mode |
| sample volume                    | 5 $\mu$ L                                                                                       |                                           |                                          |
| move phase A                     | water (containing 2 mmol/L ammonium formate, 50 mmol/L formic acid)                             | spray voltage                             | 5.5kV, -4.5kV                            |
| move phase B                     | 95% aqueous acetonitrile solution (containing 2 mmol/L ammonium formate, 50 mmol/L formic acid) | ion source temperature                    | 550°C                                    |
| elution gradient                 | 3.0min, 80% B                                                                                   | crash gas pressure                        | Medium                                   |
|                                  | 5.0min, 40% B                                                                                   | air curtain pressure atomizing            | 30psi                                    |
|                                  | 2.0 min, 40% B                                                                                  | gas pressure                              | 50psi                                    |
|                                  | 2.0min, 80% B                                                                                   | GS1 auxiliary heating gas pressure<br>GS2 | 50psi                                    |

**Table S3.** Mass spectrometric analysis parameters of 13 PSTs.

| Compound | Retention time | Parent ion | Qualitative and quantitative ions | Collisional energy | Deculturation voltage | Selection ion mode |
|----------|----------------|------------|-----------------------------------|--------------------|-----------------------|--------------------|
| STX      | 6.11           | 300.2      | 221.0/204.0                       | 35/30              | 30                    | Positive ions      |
| dcSTX    | 6.11           | 257.1      | 239.1/126.1                       | 22/30              | 30                    | Positive ions      |
| NEO      | 6.14           | 316.1      | 298.2/126.1                       | 34/34              | 34                    | Positive ions      |
| dcNEO    | 6.07           | 273.1      | 225.2/126.1                       | 35/35              | 35                    | Positive ions      |
| GTX5     | 6.09           | 380.1      | 300.1/282.1                       | 15/35              | 25                    | Positive ions      |
| GTX2     | 5.92           | 394.0      | 333.1/351.1                       | -22/16             | 16                    | Negative ions      |
| GTX3     | 6.11           | 394.0      | 351.1/333.1                       | -16/22             | 22                    | Negative ions      |
| GTX1     | 5.95           | 410.1      | 349.1/367.1                       | -22/15             | 15                    | Negative ions      |
| GTX4     | 6.14           | 410.1      | 367.1/349.4                       | -15/22             | 22                    | Negative ions      |
| C1       | 5.85           | 474.1      | 122.0/351.1                       | -25/30             | 30                    | Negative ions      |
| C2       | 6.06           | 474.1      | 122.0/351.1                       | -30/25             | 25                    | Negative ions      |
| dcGTX2   | 5.99           | 351.1      | 333.1/164.0                       | -17/30             | 30                    | Negative ions      |
| dcGTX3   | 6.17           | 351.1      | 164.0/333.1                       | -30/17             | 17                    | Negative ions      |

**Table S4.** The linear range and LOD of 13 PSTs.

| PST    | Linear range(ng/mL) | LOD(μg/kg) |
|--------|---------------------|------------|
| STX    | 5.0-500             | 10.0       |
| dcSTX  | 5.0-500             | 10.0       |
| NEO    | 5.0-500             | 10.0       |
| dcNEO  | 5.0-500             | 10.0       |
| GTX5   | 5.0-500             | 10.0       |
| GTX2   | 4.67-467            | 12.0       |
| GTX3   | 2.00-200            | 14.0       |
| GTX1   | 6.35-635            | 12.0       |
| GTX4   | 2.00-200            | 4.0        |
| C1     | 6.74-674            | 13.0       |
| C2     | 2.00-200            | 4.0        |
| dcGTX2 | 6.88-688            | 14.0       |
| dcGTX3 | 2.00-200            | 4.0        |

**Table S5.** Body weight and consumption of bivalve shellfish in different age groups [83-84].

| Age   | Gender      | Average weight (kg) | Average daily consumption of shellfish (g) |
|-------|-------------|---------------------|--------------------------------------------|
| 2~7   | male/female | 16.2                | 21.8                                       |
| 8~12  | male/female | 35.9                | 37.3                                       |
| 13~19 | male        | 55.1                | 54.1                                       |
|       | female      | 50.0                | 41.3                                       |
| 20~50 | male        | 63.1                | 69.3                                       |
|       | female      | 55.7                | 60.1                                       |
| 51~65 | male        | 64.4                | 74.5                                       |
|       | female      | 58.4                | 63.1                                       |
| >65   | male        | 61.1                | 81.6                                       |
|       | female      | 54.9                | 61.0                                       |

**Table S6.** The toxic factor of PSTs [77].

| PST    | TEF  |
|--------|------|
| STX    | 1    |
| NEO    | 1    |
| dcSTX  | 1    |
| dcNEO  | 0.4  |
| GTX1   | 0.4  |
| GTX4   | 0.7  |
| GTX2   | 0.4  |
| GTX3   | 0.6  |
| GTX5   | 0.1  |
| dcGTX2 | 0.2  |
| dcGTX3 | 0.4  |
| C1     | 0.01 |
| C2     | 0.1  |
